# Supplementary material for: High-nuclear heterometallic oxime clusters assembled from triangular subunits: solvothermal syntheses, crystal structures and magnetic properties
Source: Royal Society of Chemistry journal article supplement (doi:10.1039/c7dt03692b), 2017-11-20
Supplement: c7dt03692b1.pdf [file c7dt03692b1.pdf]

## Supporting Information

### High-nuclear heterometallic oxime clusters assembled from triangular subunit: solvothermal syntheses, crystal structures and magnetic properties

Hui-Ming Dong,<sup>a,b</sup> Zhi-Chao Zhang,<sup>a</sup> Hai-Yan Li,<sup>a</sup> Zhong-Yi Liu,<sup>a</sup> En-Cui Yang,<sup>\*a</sup> Xiao-Jun Zhao<sup>\*a, b</sup>

<sup>a</sup> College of Chemistry, Key Laboratory of Inorganic-Organic Hybrid Functional Material Chemistry, Ministry of Education, Tianjin Key Laboratory of Structure and Performance for Functional Molecules, Tianjin Normal University, Tianjin 300387, People's Republic of China

<sup>b</sup> Department of Chemistry, Collaborative Innovation Center of Chemical Science and Engineering, Nankai University, Tianjin 300071, People's Republic of China.

**Table S1.** Calculation of the agreement between the coordination polyhedron of complex **1** and various ideal polyhedra using the SHAPE program\*

| Ideal polyhedron geometry | BTPR ( $C_{2v}$ ) | JBTPR ( $C_{2v}$ ) | TDD ( $D_{2d}$ ) | SAPR ( $D_{4d}$ ) |
|---------------------------|-------------------|--------------------|------------------|-------------------|
| Agreement factor for Dy1  | 1.781             | 1.800              | 2.055            | 3.011             |
| Agreement factor for Dy2  | 3.290             | 3.494              | 2.789            | 1.839             |
| Agreement factor for Dy3  | 3.797             | 4.582              | 3.344            | 5.814             |
| Agreement factor for Dy4  | 2.364             | 2.744              | 2.192            | 2.404             |

\*BTPR = Biaugmented trigonal prism, JBTPR = Biaugmented trigonal prism, TDD = Triangular dodecahedron, SAPR = Square antiprism.

**Table S2.** Selected Bond Lengths (Å) and Angles (deg) for **1**<sup>a</sup>

|                                                |           |                                                |           |
|------------------------------------------------|-----------|------------------------------------------------|-----------|
| Dy(1)–O(5)                                     | 2.277(17) | Dy(1)–O(6)                                     | 2.369(14) |
| Dy(1)–O(16)                                    | 2.310(16) | Dy(1)–O(18)                                    | 2.376(15) |
| Dy(1)–O(4)                                     | 2.331(14) | Dy(1)–O(17) <sup>#1</sup>                      | 2.377(13) |
| Dy(1)–O(11) <sup>#1</sup>                      | 2.486(13) | Dy(1)–O(19) <sup>#1</sup>                      | 2.648(15) |
| Dy(2)–O(18)                                    | 2.319(14) | Dy(2)–O(17) <sup>#1</sup>                      | 2.393(14) |
| Dy(2)–O(19)                                    | 2.339(13) | Dy(2)–O(17)                                    | 2.437(13) |
| Dy(2)–O(16) <sup>#1</sup>                      | 2.372(15) | Dy(2)–O(11) <sup>#1</sup>                      | 2.451(15) |
| Dy(2)–O(12) <sup>#1</sup>                      | 2.380(15) | Dy(2)–O(10) <sup>#1</sup>                      | 2.465(17) |
| Dy(3)–O(3)                                     | 2.244(19) | Dy(3)–O(13)                                    | 2.45(2)   |
| Dy(3)–O(19) <sup>#1</sup>                      | 2.332(16) | Dy(3)–O(16)                                    | 2.460(13) |
| Dy(3)–O(4)                                     | 2.346(17) | Dy(3)–O(15)                                    | 2.46(3)   |
| Dy(3)–N(16)                                    | 2.42(2)   | Dy(3)–O(12)                                    | 2.475(16) |
| Dy(4)–O(11)                                    | 2.303(15) | Dy(4)–O(10)                                    | 2.359(14) |
| Dy(4)–O(1)                                     | 2.311(17) | Dy(4)–O(8)                                     | 2.41(2)   |
| Dy(4)–O(2)                                     | 2.320(18) | Dy(4)–O(18) <sup>#1</sup>                      | 2.467(15) |
| Dy(4)–O(6) <sup>#1</sup>                       | 2.350(12) | Dy(4)–O(7)                                     | 2.52(2)   |
| Ni(1)–N(7)                                     | 2.033(19) | Ni(1)–O(12)                                    | 2.067(17) |
| Ni(1)–N(11)                                    | 2.042(18) | Ni(1)–N(5)                                     | 2.11(2)   |
| Ni(1)–O(10)                                    | 2.064(15) | Ni(1)–N(9)                                     | 2.13(2)   |
| Ni(2)–N(15)                                    | 2.01(2)   | Ni(2)–N(13)                                    | 2.10(2)   |
| Ni(2)–N(24)                                    | 2.021(17) | Ni(2)–N(21)                                    | 2.11(2)   |
| Ni(2)–N(19)                                    | 2.041(19) | Ni(2)–N(17)                                    | 2.13(2)   |
| Ni(3)–O(2)                                     | 1.822(18) | Ni(3)–N(8)                                     | 1.88(2)   |
| Ni(3)–N(3)                                     | 1.84(3)   | Ni(3)–N(1)                                     | 1.90(2)   |
| O(5)–Dy(1)–O(16)                               | 140.2(6)  | O(5)–Dy(1)–O(18)                               | 140.6(6)  |
| O(5)–Dy(1)–O(4)                                | 92.9(6)   | O(16)–Dy(1)–O(18)                              | 76.2(5)   |
| O(16)–Dy(1)–O(4)                               | 70.3(5)   | O(4)–Dy(1)–O(18)                               | 119.6(6)  |
| O(5)–Dy(1)–O(6)                                | 99.4(6)   | O(6)–Dy(1)–O(18)                               | 68.1(5)   |
| O(16)–Dy(1)–O(6)                               | 112.2(6)  | O(5)–Dy(1)–O(17) <sup>#1</sup>                 | 89.2(6)   |
| O(4)–Dy(1)–O(6)                                | 80.2(5)   | O(16)–Dy(1)–O(17) <sup>#1</sup>                | 81.5(5)   |
| O(6)–Dy(1)–O(17) <sup>#1</sup>                 | 140.7(4)  | O(6)–Dy(1)–O(11) <sup>#1</sup>                 | 74.1(5)   |
| O(18)–Dy(1)–O(17) <sup>#1</sup>                | 80.9(5)   | O(18)–Dy(1)–O(11) <sup>#1</sup>                | 61.3(5)   |
| O(5)–Dy(1)–O(11) <sup>#1</sup>                 | 79.4(6)   | O(17) <sup>#1</sup> –Dy(1)–O(11) <sup>#1</sup> | 69.9(5)   |
| O(16)–Dy(1)–O(11) <sup>#1</sup>                | 131.3(5)  | O(5)–Dy(1)–O(19) <sup>#1</sup>                 | 80.5(6)   |
| O(16)–Dy(1)–O(19) <sup>#1</sup>                | 60.1(5)   | O(17) <sup>#1</sup> –Dy(1)–O(19) <sup>#1</sup> | 67.3(4)   |
| O(4)–Dy(1)–O(19) <sup>#1</sup>                 | 71.7(5)   | O(11) <sup>#1</sup> –Dy(1)–O(19) <sup>#1</sup> | 132.6(5)  |
| O(17)–Dy(2)–O(11) <sup>#1</sup>                | 122.0(4)  | O(18)–Dy(1)–O(19) <sup>#1</sup>                | 128.3(5)  |
| O(18)–Dy(2)–O(19)                              | 119.2(5)  | O(19)–Dy(2)–O(12) <sup>#1</sup>                | 79.6(5)   |
| O(4)–Dy(1)–O(17) <sup>#1</sup>                 | 138.0(5)  | O(16) <sup>#1</sup> –Dy(2)–O(12) <sup>#1</sup> | 71.4(5)   |
| O(19)–Dy(2)–O(16) <sup>#1</sup>                | 64.1(5)   | O(18)–Dy(2)–O(17) <sup>#1</sup>                | 81.8(5)   |
| O(18)–Dy(2)–O(12) <sup>#1</sup>                | 136.9(5)  | O(19)–Dy(2)–O(17) <sup>#1</sup>                | 124.8(5)  |
| O(16) <sup>#1</sup> –Dy(2)–O(17) <sup>#1</sup> | 74.9(5)   | O(16) <sup>#1</sup> –Dy(2)–O(17)               | 79.0(5)   |
| O(12) <sup>#1</sup> –Dy(2)–O(17) <sup>#1</sup> | 121.0(5)  | O(12) <sup>#1</sup> –Dy(2)–O(17)               | 145.5(5)  |

|                                                |          |                                                |          |
|------------------------------------------------|----------|------------------------------------------------|----------|
| O(18)–Dy(2)–O(17)                              | 75.6(5)  | O(17) <sup>#1</sup> –Dy(2)–O(17)               | 65.4(6)  |
| O(19)–Dy(2)–O(17)                              | 71.6(5)  | O(18)–Dy(2)–O(11) <sup>#1</sup>                | 62.6(5)  |
| O(16) <sup>#1</sup> –Dy(2)–O(11) <sup>#1</sup> | 122.7(5) | O(18)–Dy(2)–O(10) <sup>#1</sup>                | 71.8(5)  |
| O(12) <sup>#1</sup> –Dy(2)–O(11) <sup>#1</sup> | 89.5(5)  | O(19)–Dy(2)–O(10) <sup>#1</sup>                | 91.9(5)  |
| O(17) <sup>#1</sup> –Dy(2)–O(11) <sup>#1</sup> | 70.3(4)  | O(16) <sup>#1</sup> –Dy(2)–O(10) <sup>#1</sup> | 136.7(5) |
| O(12) <sup>#1</sup> –Dy(2)–O(10) <sup>#1</sup> | 69.0(5)  | O(17)–Dy(2)–O(10) <sup>#1</sup>                | 129.3(5) |
| O(17) <sup>#1</sup> –Dy(2)–O(10) <sup>#1</sup> | 142.3(5) | O(11) <sup>#1</sup> –Dy(2)–O(10) <sup>#1</sup> | 73.9(4)  |
| O(3)–Dy(3)–O(19) <sup>#1</sup>                 | 85.4(6)  | O(19) <sup>#1</sup> –Dy(3)–N(16)               | 90.6(7)  |
| O(3)–Dy(3)–O(4)                                | 135.1(6) | O(4)–Dy(3)–N(16)                               | 65.3(7)  |
| O(19) <sup>#1</sup> –Dy(3)–O(4)                | 77.5(6)  | O(3)–Dy(3)–O(13)                               | 77.1(8)  |
| O(3)–Dy(3)–N(16)                               | 73.8(7)  | O(16)–Dy(3)–O(12)                              | 68.4(5)  |
| O(4)–Dy(3)–O(13)                               | 115.8(7) | O(4)–Dy(3)–O(16)                               | 67.5(5)  |
| N(16)–Dy(3)–O(13)                              | 85.5(8)  | N(16)–Dy(3)–O(16)                              | 129.7(7) |
| O(3)–Dy(3)–O(16)                               | 137.6(5) | O(13)–Dy(3)–O(16)                              | 131.4(7) |
| O(19) <sup>#1</sup> –Dy(3)–O(16)               | 62.8(5)  | O(3)–Dy(3)–O(15)                               | 128.5(8) |
| O(19) <sup>#1</sup> –Dy(3)–O(15)               | 146.0(7) | O(16)–Dy(3)–O(15)                              | 85.9(7)  |
| O(4)–Dy(3)–O(15)                               | 78.4(8)  | O(3)–Dy(3)–O(12)                               | 78.4(5)  |
| N(16)–Dy(3)–O(15)                              | 100.7(9) | O(19) <sup>#1</sup> –Dy(3)–O(12)               | 77.9(5)  |
| O(13)–Dy(3)–O(15)                              | 51.4(9)  | O(4)–Dy(3)–O(12)                               | 135.5(5) |
| O(13)–Dy(3)–O(12)                              | 97.5(7)  | O(15)–Dy(3)–O(12)                              | 103.9(8) |
| O(11)–Dy(4)–O(1)                               | 114.1(7) | O(1)–Dy(4)–O(6) <sup>#1</sup>                  | 74.5(6)  |
| O(11)–Dy(4)–O(2)                               | 81.9(6)  | O(2)–Dy(4)–O(6) <sup>#1</sup>                  | 128.9(6) |
| O(1)–Dy(4)–O(2)                                | 72.0(6)  | O(11)–Dy(4)–O(10)                              | 78.6(5)  |
| O(11)–Dy(4)–O(6) <sup>#1</sup>                 | 78.0(5)  | O(1)–Dy(4)–O(10)                               | 147.8(6) |
| O(2)–Dy(4)–O(10)                               | 81.3(5)  | O(2)–Dy(4)–O(8)                                | 130.2(7) |
| O(6) <sup>#1</sup> –Dy(4)–O(10)                | 137.6(5) | O(6) <sup>#1</sup> –Dy(4)–O(8)                 | 83.8(6)  |
| O(11)–Dy(4)–O(8)                               | 147.2(6) | O(10)–Dy(4)–O(8)                               | 97.8(6)  |
| O(1)–Dy(4)–O(8)                                | 86.3(8)  | O(1)–Dy(4)–O(18) <sup>#1</sup>                 | 141.1(5) |
| O(2)–Dy(4)–O(18) <sup>#1</sup>                 | 138.2(6) | O(8)–Dy(4)–O(7)                                | 51.0(7)  |
| O(6) <sup>#1</sup> –Dy(4)–O(18) <sup>#1</sup>  | 66.9(5)  | O(1)–Dy(4)–O(7)                                | 76.5(7)  |
| O(10)–Dy(4)–O(18) <sup>#1</sup>                | 71.1(5)  | O(2)–Dy(4)–O(7)                                | 80.1(7)  |
| O(8)–Dy(4)–O(18) <sup>#1</sup>                 | 85.3(6)  | O(6) <sup>#1</sup> –Dy(4)–O(7)                 | 127.2(6) |
| O(10)–Dy(4)–O(7)                               | 81.5(6)  | O(18) <sup>#1</sup> –Dy(4)–O(7)                | 124.2(6) |
| N(7)–Ni(1)–O(10)                               | 90.3(7)  | O(10)–Ni(1)–O(12)                              | 83.3(7)  |
| N(11)–Ni(1)–O(10)                              | 99.7(8)  | N(7)–Ni(1)–N(5)                                | 75.6(8)  |
| N(7)–Ni(1)–O(12)                               | 101.0(9) | N(11)–Ni(1)–N(5)                               | 95.1(8)  |
| N(11)–Ni(1)–O(12)                              | 87.9(7)  | N(11)–Ni(1)–N(9)                               | 78.3(8)  |
| N(7)–Ni(1)–N(9)                                | 93.4(9)  | O(12)–Ni(1)–N(5)                               | 92.6(8)  |
| O(10)–Ni(1)–N(9)                               | 94.1(8)  | N(5)–Ni(1)–N(9)                                | 93.5(9)  |
| N(15)–Ni(2)–N(24)                              | 90.5(8)  | N(24)–Ni(2)–N(19)                              | 94.8(7)  |
| N(15)–Ni(2)–N(19)                              | 92.1(8)  | N(15)–Ni(2)–N(13)                              | 77.4(9)  |
| N(19)–Ni(2)–N(13)                              | 98.6(8)  | N(13)–Ni(2)–N(21)                              | 90.7(8)  |
| N(15)–Ni(2)–N(21)                              | 93.9(8)  | N(24)–Ni(2)–N(17)                              | 94.3(8)  |
| N(24)–Ni(2)–N(21)                              | 77.0(8)  | N(19)–Ni(2)–N(17)                              | 78.6(8)  |

|                   |           |                   |          |
|-------------------|-----------|-------------------|----------|
| N(21)–Ni(2)–N(17) | 95.9(8)   | N(13)–Ni(2)–N(17) | 99.8(9)  |
| O(2)–Ni(3)–N(8)   | 84.9(9)   | O(2)–Ni(3)–N(3)   | 88.8(9)  |
| N(8)–Ni(3)–N(1)   | 101.0(10) | N(3)–Ni(3)–N(1)   | 85.3(10) |

---

<sup>a</sup> Symmetry codes: #1 1 – x, 1 – y, 1 – z.

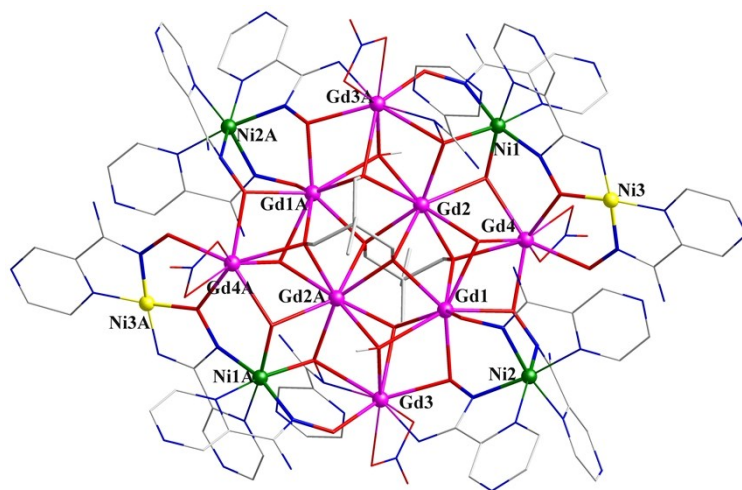

**Fig. S1** Molecular structure of **2** (Hydrogen atoms were omitted for clarity, symmetry codes: A =  $1 - x, -y, 1 - z$ ).

**Table S3.** Calculation of the agreement between the coordination polyhedron of **2** and various ideal polyhedra using the SHAPE program\*

| Ideal polyhedron geometry | BTPR ( $C_{2v}$ )  | JBTPR ( $C_{2v}$ ) | TDD ( $D_{2d}$ ) | SAPR ( $D_{4d}$ )   |
|---------------------------|--------------------|--------------------|------------------|---------------------|
| Agreement factor for Gd1  | 1.709              | 1.857              | 2.104            | 3.141               |
| Agreement factor for Gd2  | 3.699              | 3.959              | 2.931            | 2.039               |
| Agreement factor for Gd4  | 2.715              | 3.129              | 2.205            | 2.288               |
| Ideal polyhedron geometry | TCTPR ( $D_{3h}$ ) | CSAPR ( $C_{4v}$ ) | MFF ( $C_s$ )    | JCSAPR ( $C_{4v}$ ) |
| Agreement factor for Gd3  | 5.248              | 4.307              | 3.566            | 4.833               |

\*BTPR = Biaugmented trigonal prism, JBTPR = Biaugmented trigonal prism, TDD = Triangular dodecahedron, SAPR = Square antiprism; TCTPR = Spherical tricapped trigonal prism, CSAPR = Spherical capped square antiprism, MFF= Muffin, JCSAPR = Capped square antiprism.

**Table S4.** Selected Bond Lengths (Å) and Angles (deg) for **2**<sup>a</sup>

|                               |           |                                 |           |
|-------------------------------|-----------|---------------------------------|-----------|
| Gd(1)–O(8)                    | 2.300(11) | Gd(1)–O(2)                      | 2.404(9)  |
| Gd(1)–O(7)                    | 2.336(9)  | Gd(1)–O(3) <sup>#1</sup>        | 2.434(8)  |
| Gd(1)–O(1)                    | 2.357(9)  | Gd(1)–O(4)                      | 2.513(9)  |
| Gd(1)–O(9)                    | 2.403(9)  | Gd(1)–O(5)                      | 2.612(9)  |
| Gd(1)–N(11)                   | 2.893(12) | Gd(2)–O(2)                      | 2.331(9)  |
| Gd(2)–O(13)                   | 2.390(9)  | Gd(2)–O(1) <sup>#1</sup>        | 2.427(9)  |
| Gd(2)–O(3) <sup>#1</sup>      | 2.402(9)  | Gd(2)–O(3)                      | 2.446(9)  |
| Gd(2)–O(5) <sup>#1</sup>      | 2.422(9)  | Gd(2)–O(12)                     | 2.463(9)  |
| Gd(2)–O(4)                    | 2.468(9)  | Gd(3)–O(6)                      | 2.253(10) |
| Gd(3)–O(5)                    | 2.348(9)  | Gd(3)–O(14)                     | 2.478(11) |
| Gd(3)–O(7)                    | 2.368(9)  | Gd(3)–O(1)                      | 2.484(9)  |
| Gd(3)–N(8)                    | 2.440(12) | Gd(3)–O(15)                     | 2.485(11) |
| Gd(3)–N(27) <sup>#1</sup>     | 2.56(2)   | Gd(3)–O(13) <sup>#1</sup>       | 2.569(9)  |
| Gd(4)–O(4)                    | 2.313(10) | Gd(4)–O(12)                     | 2.414(8)  |
| Gd(4)–O(11)                   | 2.339(10) | Gd(4)–O(17)                     | 2.450(13) |
| Gd(4)–O(10)                   | 2.354(10) | Gd(4)–O(2)                      | 2.490(8)  |
| Gd(4)–O(9)                    | 2.355(9)  | Gd(4)–O(18)                     | 2.537(12) |
| Ni(1)–O(12)                   | 2.023(9)  | Ni(1)–O(13)                     | 2.085(10) |
| Ni(1)–N(23)                   | 2.028(12) | Ni(1)–N(1) <sup>#1</sup>        | 2.091(13) |
| Ni(1)–N(3) <sup>#1</sup>      | 2.045(11) | Ni(1)–N(21)                     | 2.103(13) |
| Ni(2)–N(7)                    | 2.035(11) | Ni(2)–N(5)                      | 2.088(14) |
| Ni(2)–N(11)                   | 2.052(11) | Ni(2)–N(9)                      | 2.092(12) |
| Ni(2)–N(15)                   | 2.055(11) | Ni(2)–N(13)                     | 2.100(11) |
| Ni(3)–N(19)                   | 1.814(14) | Ni(3)–N(24)                     | 1.884(13) |
| Ni(3)–O(11)                   | 1.826(10) | Ni(3)–N(17)                     | 1.887(13) |
| O(8)–Gd(1)–O(7)               | 95.6(3)   | O(9)–Gd(1)–O(3) <sup>#1</sup>   | 139.5(3)  |
| O(8)–Gd(1)–O(1)               | 141.5(3)  | O(2)–Gd(1)–O(3) <sup>#1</sup>   | 80.1(3)   |
| O(7)–Gd(1)–O(1)               | 70.2(3)   | O(8)–Gd(1)–O(4)                 | 78.9(3)   |
| O(8)–Gd(1)–O(9)               | 100.2(3)  | O(7)–Gd(1)–O(3) <sup>#1</sup>   | 138.8(3)  |
| O(7)–Gd(1)–O(9)               | 80.3(3)   | O(1)–Gd(1)–O(4)                 | 130.0(3)  |
| O(1)–Gd(1)–O(9)               | 111.6(3)  | O(9)–Gd(1)–O(4)                 | 73.1(3)   |
| O(8)–Gd(1)–O(2)               | 139.0(3)  | O(2)–Gd(1)–O(4)                 | 60.2(3)   |
| O(7)–Gd(1)–O(2)               | 119.0(3)  | O(3) <sup>#1</sup> –Gd(1)–O(4)  | 69.7(3)   |
| O(1)–Gd(1)–O(2)               | 75.4(3)   | O(8)–Gd(1)–O(5)                 | 80.5(3)   |
| O(9)–Gd(1)–O(2)               | 67.7(3)   | O(7)–Gd(1)–O(5)                 | 70.8(3)   |
| O(8)–Gd(1)–O(3) <sup>#1</sup> | 87.9(3)   | O(1)–Gd(1)–O(5)                 | 61.1(3)   |
| O(1)–Gd(1)–O(3) <sup>#1</sup> | 81.7(3)   | O(2)–Gd(1)–O(5)                 | 129.3(3)  |
| O(4)–Gd(1)–O(5)               | 134.5(3)  | O(3) <sup>#1</sup> –Gd(1)–O(5)  | 69.4(3)   |
| O(8)–Gd(1)–N(11)              | 27.9(3)   | O(2)–Gd(1)–N(11)                | 127.1(3)  |
| O(7)–Gd(1)–N(11)              | 86.2(3)   | O(3) <sup>#1</sup> –Gd(1)–N(11) | 112.0(3)  |
| O(5)–Gd(1)–N(11)              | 102.0(3)  | O(4)–Gd(1)–N(11)                | 75.8(3)   |
| O(9)–Gd(1)–N(11)              | 72.8(3)   | O(5) <sup>#1</sup> –Gd(2)–O(12) | 93.3(3)   |
| O(2)–Gd(2)–O(13)              | 135.5(3)  | O(3) <sup>#1</sup> –Gd(2)–O(3)  | 64.8(4)   |

|                                              |          |                                                |          |
|----------------------------------------------|----------|------------------------------------------------|----------|
| O(2)–Gd(2)–O(3) <sup>#1</sup>                | 82.3(3)  | O(5) <sup>#1</sup> –Gd(2)–O(3)                 | 72.5(3)  |
| O(13)–Gd(2)–O(3) <sup>#1</sup>               | 119.8(3) | O(1) <sup>#1</sup> –Gd(2)–O(3)                 | 80.1(3)  |
| O(2)–Gd(2)–O(5) <sup>#1</sup>                | 121.6(3) | O(2)–Gd(2)–O(12)                               | 72.8(3)  |
| O(13)–Gd(2)–O(5) <sup>#1</sup>               | 80.5(3)  | O(13)–Gd(2)–O(12)                              | 67.4(3)  |
| O(3) <sup>#1</sup> –Gd(2)–O(5) <sup>#1</sup> | 123.1(3) | O(3) <sup>#1</sup> –Gd(2)–O(12)                | 143.2(3) |
| O(13)–Gd(2)–O(1) <sup>#1</sup>               | 71.8(3)  | O(1) <sup>#1</sup> –Gd(2)–O(12)                | 135.7(3) |
| O(3) <sup>#1</sup> –Gd(2)–O(1) <sup>#1</sup> | 73.7(3)  | O(3)–Gd(2)–O(12)                               | 130.5(3) |
| O(5) <sup>#1</sup> –Gd(2)–O(1) <sup>#1</sup> | 63.1(3)  | O(2)–Gd(2)–O(4)                                | 61.8(3)  |
| O(2)–Gd(2)–O(3)                              | 75.4(3)  | O(13)–Gd(2)–O(4)                               | 87.9(3)  |
| O(13)–Gd(2)–O(3)                             | 147.6(3) | O(3) <sup>#1</sup> –Gd(2)–O(4)                 | 71.0(3)  |
| O(12)–Gd(2)–O(4)                             | 73.5(3)  | O(3)–Gd(2)–O(4)                                | 121.2(3) |
| O(1) <sup>#1</sup> –Gd(2)–O(4)               | 122.0(3) | N(8)–Gd(3)–O(15)                               | 99.5(4)  |
| O(6)–Gd(3)–O(5)                              | 85.4(4)  | O(5)–Gd(3)–O(1)                                | 63.3(3)  |
| O(6)–Gd(3)–O(7)                              | 134.4(4) | O(7)–Gd(3)–O(1)                                | 67.5(3)  |
| O(5)–Gd(3)–O(7)                              | 75.1(3)  | N(8)–Gd(3)–O(1)                                | 128.6(3) |
| O(6)–Gd(3)–N(8)                              | 73.7(4)  | O(14)–Gd(3)–O(1)                               | 133.5(3) |
| O(5)–Gd(3)–N(8)                              | 87.0(4)  | O(6)–Gd(3)–O(15)                               | 129.4(4) |
| O(7)–Gd(3)–N(8)                              | 64.6(4)  | O(5)–Gd(3)–O(15)                               | 145.1(4) |
| O(6)–Gd(3)–O(14)                             | 77.8(4)  | O(7)–Gd(3)–O(15)                               | 77.0(4)  |
| O(7)–Gd(3)–O(14)                             | 113.7(4) | O(14)–Gd(3)–O(15)                              | 51.6(4)  |
| N(8)–Gd(3)–O(14)                             | 83.8(4)  | O(1)–Gd(3)–O(15)                               | 86.9(4)  |
| O(6)–Gd(3)–O(1)                              | 137.0(3) | O(6)–Gd(3)–N(27) <sup>#1</sup>                 | 88.9(5)  |
| O(5)–Gd(3)–N(27) <sup>#1</sup>               | 107.4(5) | O(7)–Gd(3)–O(13) <sup>#1</sup>                 | 134.8(3) |
| O(7)–Gd(3)–N(27) <sup>#1</sup>               | 136.0(5) | N(8)–Gd(3)–O(13) <sup>#1</sup>                 | 148.9(4) |
| O(5)–Gd(3)–O(13) <sup>#1</sup>               | 78.3(3)  | O(14)–Gd(3)–O(13) <sup>#1</sup>                | 102.4(4) |
| O(14)–Gd(3)–N(27) <sup>#1</sup>              | 77.3(5)  | O(1)–Gd(3)–O(13) <sup>#1</sup>                 | 68.0(3)  |
| O(1)–Gd(3)–N(27) <sup>#1</sup>               | 74.7(4)  | O(15)–Gd(3)–O(13) <sup>#1</sup>                | 108.2(4) |
| O(15)–Gd(3)–N(27) <sup>#1</sup>              | 79.3(5)  | N(27) <sup>#1</sup> –Gd(3)–O(13) <sup>#1</sup> | 30.4(4)  |
| O(6)–Gd(3)–O(13) <sup>#1</sup>               | 77.9(3)  | O(10)–Gd(4)–O(18)                              | 78.9(5)  |
| O(4)–Gd(4)–O(11)                             | 83.5(3)  | O(9)–Gd(4)–O(12)                               | 137.6(3) |
| O(4)–Gd(4)–O(10)                             | 112.9(4) | O(4)–Gd(4)–O(17)                               | 145.1(4) |
| O(11)–Gd(4)–O(10)                            | 70.4(4)  | O(11)–Gd(4)–O(17)                              | 131.1(4) |
| O(4)–Gd(4)–O(9)                              | 77.7(3)  | O(10)–Gd(4)–O(17)                              | 87.8(4)  |
| O(11)–Gd(4)–O(9)                             | 129.7(4) | O(9)–Gd(4)–O(17)                               | 81.4(4)  |
| O(10)–Gd(4)–O(9)                             | 74.9(3)  | O(12)–Gd(4)–O(17)                              | 101.0(4) |
| O(4)–Gd(4)–O(12)                             | 77.2(3)  | O(4)–Gd(4)–O(2)                                | 61.7(3)  |
| O(11)–Gd(4)–O(12)                            | 80.2(3)  | O(11)–Gd(4)–O(2)                               | 138.4(3) |
| O(10)–Gd(4)–O(12)                            | 147.0(3) | O(10)–Gd(4)–O(2)                               | 141.9(3) |
| O(9)–Gd(4)–O(2)                              | 67.1(3)  | O(12)–Gd(4)–O(18)                              | 81.8(4)  |
| O(12)–Gd(4)–O(2)                             | 71.0(3)  | O(17)–Gd(4)–O(18)                              | 51.9(4)  |
| O(17)–Gd(4)–O(2)                             | 84.5(4)  | O(2)–Gd(4)–O(18)                               | 122.5(4) |
| O(11)–Gd(4)–O(18)                            | 80.6(4)  | O(9)–Gd(4)–O(18)                               | 126.8(4) |
| O(12)–Ni(1)–N(23)                            | 90.1(4)  | N(23)–Ni(1)–N(1) <sup>#1</sup>                 | 92.8(5)  |
| O(12)–Ni(1)–N(3) <sup>#1</sup>               | 100.9(4) | N(3) <sup>#1</sup> –Ni(1)–N(1) <sup>#1</sup>   | 78.4(5)  |



|                                 |          |                                 |          |
|---------------------------------|----------|---------------------------------|----------|
| O(12)–Ni(1)–O(13)               | 81.9(4)  | N(1) <sup>#1</sup> –Ni(1)–N(21) | 93.3(5)  |
| N(23)–Ni(1)–O(13)               | 100.1(5) | N(23)–Ni(1)–N(21)               | 77.0(5)  |
| N(3) <sup>#1</sup> –Ni(1)–O(13) | 89.5(4)  | N(3) <sup>#1</sup> –Ni(1)–N(21) | 93.1(5)  |
| O(12)–Ni(1)–N(1) <sup>#1</sup>  | 95.0(4)  | O(13)–Ni(1)–N(21)               | 92.6(4)  |
| N(11)–Ni(2)–N(15)               | 96.3(5)  | N(7)–Ni(2)–N(11)                | 91.5(5)  |
| N(5)–Ni(2)–N(13)                | 90.3(5)  | N(7)–Ni(2)–N(15)                | 91.4(4)  |
| N(11)–Ni(2)–N(9)                | 78.2(5)  | N(7)–Ni(2)–N(5)                 | 76.4(5)  |
| N(15)–Ni(2)–N(9)                | 94.2(5)  | N(11)–Ni(2)–N(5)                | 97.5(5)  |
| N(5)–Ni(2)–N(9)                 | 100.3(5) | N(7)–Ni(2)–N(13)                | 95.2(4)  |
| N(9)–Ni(2)–N(13)                | 95.5(4)  | N(15)–Ni(2)–N(13)               | 77.2(5)  |
| N(19)–Ni(3)–O(11)               | 89.5(5)  | N(19)–Ni(3)–N(17)               | 83.8(6)  |
| O(11)–Ni(3)–N(24)               | 86.0(5)  | N(24)–Ni(3)–N(17)               | 100.8(6) |

---

<sup>a</sup> Symmetry codes: <sup>#1</sup> 1 – x, – y, 1 – z.

**Table S5.** Calculation of the agreement between the coordination polyhedron of **3** and various ideal polyhedra using the SHAPE program \*

| Ideal polyhedron geometry | TCTPR ( $D_{3h}$ ) | CSAPR ( $C_{4v}$ ) | MFF ( $C_s$ )      | JCSAPR ( $C_{4v}$ ) |
|---------------------------|--------------------|--------------------|--------------------|---------------------|
| Agreement factor for Dy1  | 0.458              | 1.015              | 1.307              | 1.897               |
| Agreement factor for Dy2  | 4.911              | 4.115              | 3.649              | 4.973               |
| Ideal polyhedron geometry | TDD ( $D_{2d}$ )   | BTPR ( $C_{2v}$ )  | JBTPR ( $C_{2v}$ ) | SAPR ( $D_{4d}$ )   |
| Agreement factor for Dy3  | 1.502              | 2.048              | 2.388              | 2.816               |

\*TCTPR = Spherical tricapped trigonal prism, CSAPR = Spherical capped square antiprism, MFF= Muffin, JCSAPR = Capped square antiprism; TDD = Triangular dodecahedron, BTPR = Biaugmented trigonal prism, JBTPR = Biaugmented trigonal prism, SAPR = Square antiprism.

**Table S6.** Calculation of the agreement between the coordination polyhedron of **4** and various ideal polyhedra using the SHAPE program \*

| Ideal polyhedron geometry | TCTPR ( $D_{3h}$ ) | CSAPR ( $C_{4v}$ ) | MFF ( $C_s$ )      | JCSAPR ( $C_{4v}$ ) |
|---------------------------|--------------------|--------------------|--------------------|---------------------|
| Agreement factor for Gd1  | 0.403              | 1.003              | 1.300              | 1.911               |
| Agreement factor for Gd2  | 5.038              | 4.276              | 3.763              | 5.057               |
| Ideal polyhedron geometry | TDD ( $D_{2d}$ )   | BTPR ( $C_{2v}$ )  | JBTPR ( $C_{2v}$ ) | SAPR ( $D_{4d}$ )   |
| Agreement factor for Gd3  | 1.659              | 2.032              | 2.399              | 2.888               |

\*TCTPR = Spherical tricapped trigonal prism, CSAPR = Spherical capped square antiprism, MFF= Muffin, JCSAPR = Capped square antiprism; TDD = Triangular dodecahedron, BTPR = Biaugmented trigonal prism, JBTPR = Biaugmented trigonal prism, SAPR = Square antiprism.

**Table S7.** Selected Bond Lengths (Å) and Angles (deg) for **3<sup>a</sup>**

|                                               |            |                                 |            |
|-----------------------------------------------|------------|---------------------------------|------------|
| Dy(1)–O(2)                                    | 2.350(3)   | Dy(1)–O(4)                      | 2.422(3)   |
| Dy(1)–O(12)                                   | 2.378(5)   | Dy(1)–O(1)                      | 2.449(3)   |
| Dy(1)–O(3)                                    | 2.510(3)   | Dy(2)–O(1)                      | 2.326(3)   |
| Dy(2)–O(2) <sup>#1</sup>                      | 2.340(3)   | Dy(2)–O(7)                      | 2.446(4)   |
| Dy(2)–O(8)                                    | 2.344(4)   | Dy(2)–N(7) <sup>#1</sup>        | 2.529(4)   |
| Dy(2)–O(11) <sup>#1</sup>                     | 2.356(3)   | Dy(2)–O(4) <sup>#1</sup>        | 2.624(3)   |
| Dy(2)–O(5)                                    | 2.367(3)   | Dy(2)–O(6)                      | 2.440(3)   |
| Dy(3)–O(9)                                    | 2.298(3)   | Dy(3)–O(5) <sup>#1</sup>        | 2.443(3)   |
| Dy(3)–O(2)                                    | 2.317(3)   | Dy(3)–N(7)                      | 2.451(4)   |
| Dy(3)–O(10)                                   | 2.330(3)   | Dy(3)–O(3) <sup>#1</sup>        | 2.455(3)   |
| Dy(3)–N(4) <sup>#1</sup>                      | 2.358(4)   | Dy(3)–N(5)                      | 2.584(4)   |
| Ni(1)–N(3)                                    | 1.841(4)   | Ni(1)–O(4)                      | 1.856(3)   |
| Ni(1)–N(8)                                    | 1.844(4)   | Ni(1)–N(1)                      | 1.890(4)   |
| Ni(2)–O(11) <sup>#1</sup>                     | 1.839(3)   | Ni(2)–N(15)                     | 1.848(4)   |
| Ni(2)–N(28) <sup>#1</sup>                     | 1.840(4)   | Ni(2)–N(13)                     | 1.886(4)   |
| Ni(3)–N(23) <sup>#1</sup>                     | 2.016(4)   | Ni(3)–N(21) <sup>#1</sup>       | 2.119(4)   |
| Ni(3)–O(1) <sup>#1</sup>                      | 2.029(3)   | Ni(3)–N(25)                     | 2.137(4)   |
| Ni(3)–N(27)                                   | 2.038(4)   | Ni(3)–O(3)                      | 2.173(3)   |
| Ni(4)–O(6)                                    | 1.829(3)   | Ni(4)–N(16)                     | 1.866(4)   |
| Ni(4)–N(11)                                   | 1.858(4)   | Ni(4)–N(9)                      | 1.878(4)   |
| Ni(5)–O(10)                                   | 1.824(3)   | Ni(5)–N(19)                     | 1.859(4)   |
| Ni(5)–N(24)                                   | 1.854(4)   | Ni(5)–N(17)                     | 1.882(4)   |
| O(2) <sup>#1</sup> –Dy(1)–O(2)                | 149.13(15) | O(2)–Dy(1)–O(12)                | 74.56(8)   |
| O(2)–Dy(1)–O(4) <sup>#1</sup>                 | 134.54(10) | O(2) <sup>#1</sup> –Dy(1)–O(4)  | 134.55(10) |
| O(4)–Dy(1)–O(4) <sup>#1</sup>                 | 86.74(15)  | O(2)–Dy(1)–O(4)                 | 71.67(10)  |
| O(2)–Dy(1)–O(1) <sup>#1</sup>                 | 70.38(10)  | O(12)–Dy(1)–O(4)                | 136.63(7)  |
| O(4)–Dy(1)–O(1) <sup>#1</sup>                 | 71.85(10)  | O(2)–Dy(1)–O(1)                 | 99.71(10)  |
| O(4) <sup>#1</sup> –Dy(1)–O(1) <sup>#1</sup>  | 140.17(10) | O(12)–Dy(1)–O(1)                | 71.70(7)   |
| O(1)–Dy(1)–O(3)                               | 130.57(10) | O(4)–Dy(1)–O(1)                 | 140.18(10) |
| O(1) <sup>#1</sup> –Dy(1)–O(1)                | 143.40(15) | O(2)–Dy(1)–O(3) <sup>#1</sup>   | 65.77(10)  |
| O(2) <sup>#1</sup> –Dy(1)–O(3)                | 65.77(10)  | O(4)–Dy(1)–O(3) <sup>#1</sup>   | 73.69(10)  |
| O(2)–Dy(1)–O(3)                               | 129.69(10) | O(1)–Dy(1)–O(3) <sup>#1</sup>   | 67.59(10)  |
| O(12)–Dy(1)–O(3)                              | 115.39(7)  | O(3)–Dy(1)–O(3) <sup>#1</sup>   | 129.23(14) |
| O(4)–Dy(1)–O(3)                               | 69.97(10)  | O(1)–Dy(2)–O(2) <sup>#1</sup>   | 72.71(11)  |
| O(1)–Dy(2)–O(8)                               | 101.68(13) | O(8)–Dy(2)–O(6)                 | 77.35(13)  |
| O(2) <sup>#1</sup> –Dy(2)–O(8)                | 133.74(12) | O(11) <sup>#1</sup> –Dy(2)–O(6) | 71.53(11)  |
| O(1)–Dy(2)–O(11) <sup>#1</sup>                | 81.45(11)  | O(5)–Dy(2)–O(6)                 | 69.57(11)  |
| O(2) <sup>#1</sup> –Dy(2)–O(11) <sup>#1</sup> | 138.91(11) | O(1)–Dy(2)–O(7)                 | 80.39(12)  |
| O(8)–Dy(2)–O(11) <sup>#1</sup>                | 81.94(13)  | O(2) <sup>#1</sup> –Dy(2)–O(7)  | 79.88(13)  |
| O(1)–Dy(2)–O(5)                               | 136.90(11) | O(8)–Dy(2)–O(7)                 | 54.20(14)  |
| O(2) <sup>#1</sup> –Dy(2)–O(5)                | 67.30(11)  | O(11) <sup>#1</sup> –Dy(2)–O(7) | 127.03(12) |
| O(8)–Dy(2)–O(5)                               | 94.64(12)  | O(5)–Dy(2)–O(7)                 | 77.49(12)  |

|                                                |            |                                                |            |
|------------------------------------------------|------------|------------------------------------------------|------------|
| O(11) <sup>#1</sup> -Dy(2)-O(5)                | 140.73(11) | O(6)-Dy(2)-O(7)                                | 117.86(13) |
| O(2) <sup>#1</sup> -Dy(2)-O(4) <sup>#1</sup>   | 68.24(10)  | O(1)-Dy(2)-N(7) <sup>#1</sup>                  | 101.21(11) |
| O(2) <sup>#1</sup> -Dy(2)-O(6)                 | 127.59(11) | O(2) <sup>#1</sup> -Dy(2)-N(7) <sup>#1</sup>   | 67.68(12)  |
| O(6)-Dy(2)-N(7) <sup>#1</sup>                  | 75.65(12)  | N(7) <sup>#1</sup> -Dy(2)-O(4) <sup>#1</sup>   | 32.61(10)  |
| O(7)-Dy(2)-N(7) <sup>#1</sup>                  | 145.03(13) | O(11) <sup>#1</sup> -Dy(2)-N(7) <sup>#1</sup>  | 87.31(11)  |
| O(1)-Dy(2)-O(4) <sup>#1</sup>                  | 70.23(10)  | O(5)-Dy(2)-N(7) <sup>#1</sup>                  | 78.18(11)  |
| O(6)-Dy(2)-O(4) <sup>#1</sup>                  | 98.89(10)  | O(11) <sup>#1</sup> -Dy(2)-O(4) <sup>#1</sup>  | 73.24(10)  |
| O(7)-Dy(2)-O(4) <sup>#1</sup>                  | 141.55(12) | O(5)-Dy(2)-O(4) <sup>#1</sup>                  | 107.62(10) |
| O(10)-Dy(3)-N(5)                               | 149.00(11) | O(9)-Dy(3)-N(7)                                | 138.22(12) |
| O(9)-Dy(3)-O(2)                                | 133.01(11) | O(2)-Dy(3)-N(7)                                | 69.38(11)  |
| O(9)-Dy(3)-O(10)                               | 73.43(11)  | O(10)-Dy(3)-N(7)                               | 147.82(11) |
| O(2)-Dy(3)-O(10)                               | 83.63(11)  | N(4) <sup>#1</sup> -Dy(3)-N(7)                 | 87.56(13)  |
| O(9)-Dy(3)-N(4) <sup>#1</sup>                  | 91.71(13)  | O(5) <sup>#1</sup> -Dy(3)-N(7)                 | 78.28(12)  |
| O(2)-Dy(3)-N(4) <sup>#1</sup>                  | 132.73(12) | O(9)-Dy(3)-O(3) <sup>#1</sup>                  | 143.13(12) |
| O(10)-Dy(3)-N(4) <sup>#1</sup>                 | 98.96(13)  | O(2)-Dy(3)-O(3) <sup>#1</sup>                  | 67.16(10)  |
| O(9)-Dy(3)-O(5) <sup>#1</sup>                  | 81.87(12)  | O(10)-Dy(3)-O(3) <sup>#1</sup>                 | 80.51(11)  |
| O(2)-Dy(3)-O(5) <sup>#1</sup>                  | 66.39(11)  | N(4) <sup>#1</sup> -Dy(3)-O(3) <sup>#1</sup>   | 66.83(11)  |
| O(10)-Dy(3)-O(5) <sup>#1</sup>                 | 107.25(11) | O(5) <sup>#1</sup> -Dy(3)-O(3) <sup>#1</sup>   | 131.50(10) |
| N(4) <sup>#1</sup> -Dy(3)-O(5) <sup>#1</sup>   | 149.80(13) | N(7)-Dy(3)-O(3) <sup>#1</sup>                  | 73.17(11)  |
| O(5) <sup>#1</sup> -Dy(3)-N(5)                 | 76.61(11)  | O(9)-Dy(3)-N(5)                                | 76.84(11)  |
| N(7)-Dy(3)-N(5)                                | 63.00(12)  | O(2)-Dy(3)-N(5)                                | 124.10(11) |
| O(3) <sup>#1</sup> -Dy(3)-N(5)                 | 120.73(11) | N(8)-Ni(1)-O(4)                                | 85.08(15)  |
| N(3)-Ni(1)-O(4)                                | 93.03(15)  | N(8)-Ni(1)-N(1)                                | 100.53(16) |
| N(3)-Ni(1)-N(1)                                | 81.61(16)  | O(11) <sup>#1</sup> -Ni(2)-N(28) <sup>#1</sup> | 85.20(16)  |
| O(11) <sup>#1</sup> -Ni(2)-N(15)               | 91.88(16)  | N(28) <sup>#1</sup> -Ni(2)-N(13)               | 100.82(18) |
| N(4) <sup>#1</sup> -Dy(3)-N(5)                 | 73.20(13)  | N(15)-Ni(2)-N(13)                              | 82.01(17)  |
| N(23) <sup>#1</sup> -Ni(3)-N(21) <sup>#1</sup> | 77.25(16)  | N(23) <sup>#1</sup> -Ni(3)-O(1) <sup>#1</sup>  | 103.49(15) |
| O(1) <sup>#1</sup> -Ni(3)-N(21) <sup>#1</sup>  | 90.02(14)  | O(1) <sup>#1</sup> -Ni(3)-N(27)                | 89.89(14)  |
| N(27)-Ni(3)-N(21) <sup>#1</sup>                | 95.44(17)  | N(23) <sup>#1</sup> -Ni(3)-N(25)               | 90.66(17)  |
| O(1) <sup>#1</sup> -Ni(3)-O(3)                 | 81.98(12)  | N(27)-Ni(3)-N(25)                              | 76.48(16)  |
| N(27)-Ni(3)-O(3)                               | 99.91(14)  | N(21) <sup>#1</sup> -Ni(3)-N(25)               | 95.82(16)  |
| N(23) <sup>#1</sup> -Ni(3)-O(3)                | 89.60(14)  | N(25)-Ni(3)-O(3)                               | 95.62(13)  |
| O(6)-Ni(4)-N(11)                               | 89.77(15)  | N(16)-Ni(4)-N(9)                               | 101.08(18) |
| O(6)-Ni(4)-N(16)                               | 86.00(16)  | N(11)-Ni(4)-N(9)                               | 83.30(17)  |
| O(10)-Ni(5)-N(19)                              | 90.33(15)  | N(24)-Ni(5)-N(17)                              | 101.41(18) |
| O(10)-Ni(5)-N(24)                              | 84.89(16)  | N(19)-Ni(5)-N(17)                              | 83.78(17)  |

<sup>a</sup> Symmetry codes: #1 2 - x, y, 3/2 - z.

**Table S8.** Selected Bond Lengths (Å) and Angles (deg) for **4<sup>a</sup>**

|                                               |            |                                              |            |
|-----------------------------------------------|------------|----------------------------------------------|------------|
| Gd(1)–O(7)                                    | 2.535(3)   | Gd(1)–O(1)                                   | 2.453(3)   |
| Gd(1)–O(11)                                   | 2.382(3)   | Gd(1)–O(12)                                  | 2.476(3)   |
| Gd(1)–O(10)                                   | 2.402(6)   | Gd(2)–O(1)                                   | 2.646(3)   |
| Gd(2)–O(12) <sup>#1</sup>                     | 2.362(3)   | Gd(2)–O(2)                                   | 2.384(3)   |
| Gd(2)–O(11)                                   | 2.372(3)   | Gd(2)–O(9)                                   | 2.447(4)   |
| Gd(2)–O(8)                                    | 2.375(4)   | Gd(2)–O(6) <sup>#1</sup>                     | 2.468(3)   |
| Gd(2)–O(5) <sup>#1</sup>                      | 2.381(3)   | Gd(2)–N(4)                                   | 2.558(4)   |
| Gd(3)–N(1)                                    | 2.612(4)   | Gd(3)–O(3)                                   | 2.326(3)   |
| Gd(3)–O(2)                                    | 2.469(3)   | Gd(3)–O(11)                                  | 2.337(3)   |
| Gd(3)–O(7)                                    | 2.488(3)   | Gd(3)–O(4)                                   | 2.349(3)   |
| Gd(3)–N(4)                                    | 2.498(4)   | Gd(3)–N(27)                                  | 2.398(4)   |
| Ni(1)–N(25)                                   | 1.883(4)   | Ni(1)–N(28)                                  | 1.847(4)   |
| Ni(1)–O(1) <sup>#1</sup>                      | 1.856(3)   | Ni(1)–N(3) <sup>#1</sup>                     | 1.853(4)   |
| Ni(2)–N(21)                                   | 1.891(5)   | Ni(2)–O(5)                                   | 1.831(4)   |
| Ni(2)–N(24)                                   | 1.851(4)   | Ni(2)–N(19)                                  | 1.848(4)   |
| Ni(3)–N(20)                                   | 2.042(4)   | Ni(3)–N(17)                                  | 2.133(4)   |
| Ni(3)–N(16)                                   | 2.028(4)   | Ni(3)–O(7)                                   | 2.173(3)   |
| Ni(3)–O(12)                                   | 2.037(3)   | Ni(3)–N(13)                                  | 2.118(4)   |
| Ni(4)–N(5)                                    | 1.885(4)   | Ni(4)–O(6) <sup>#1</sup>                     | 1.823(3)   |
| Ni(4)–N(8)                                    | 1.858(4)   | Ni(4)–N(23) <sup>#1</sup>                    | 1.855(4)   |
| Ni(5)–N(12)                                   | 1.862(4)   | Ni(5)–N(15)                                  | 1.876(5)   |
| Ni(5)–O(4)                                    | 1.833(3)   | Ni(5)–N(9)                                   | 1.894(5)   |
| O(11) <sup>#1</sup> –Gd(1)–O(11)              | 148.55(16) | O(11)–Gd(1)–O(12)                            | 99.09(11)  |
| O(1)–Gd(1)–O(12) <sup>#1</sup>                | 71.88(11)  | O(10)–Gd(1)–O(12)                            | 71.44(8)   |
| O(11)–Gd(1)–O(10)                             | 74.27(8)   | O(1)–Gd(1)–O(12)                             | 140.33(10) |
| O(11)–Gd(1)–O(12) <sup>#1</sup>               | 70.70(10)  | O(12) <sup>#1</sup> –Gd(1)–O(12)             | 142.88(16) |
| O(11)–Gd(1)–O(1)                              | 71.47(11)  | O(11)–Gd(1)–O(7) <sup>#1</sup>               | 129.31(10) |
| O(10)–Gd(1)–O(1)                              | 136.10(8)  | O(1)–Gd(1)–O(7) <sup>#1</sup>                | 69.77(10)  |
| O(1)–Gd(1)–O(1) <sup>#1</sup>                 | 87.80(15)  | O(12)–Gd(1)–O(7) <sup>#1</sup>               | 131.57(10) |
| O(11)–Gd(1)–O(1) <sup>#1</sup>                | 135.10(10) | O(12)–Gd(1)–O(7)                             | 67.09(10)  |
| O(11)–Gd(1)–O(7)                              | 66.42(10)  | O(7) <sup>#1</sup> –Gd(1)–O(7)               | 128.98(14) |
| O(10)–Gd(1)–O(7)                              | 115.51(7)  | O(1) <sup>#1</sup> –Gd(1)–O(7)               | 69.76(10)  |
| O(1)–Gd(1)–O(7)                               | 74.05(10)  | O(12) <sup>#1</sup> –Gd(2)–O(11)             | 72.88(11)  |
| O(12) <sup>#1</sup> –Gd(2)–O(8)               | 101.37(13) | O(8)–Gd(2)–O(2)                              | 95.63(14)  |
| O(11)–Gd(2)–O(8)                              | 133.42(13) | O(5) <sup>#1</sup> –Gd(2)–O(2)               | 139.86(11) |
| O(12) <sup>#1</sup> –Gd(2)–O(5) <sup>#1</sup> | 81.61(11)  | O(12) <sup>#1</sup> –Gd(2)–O(9)              | 81.69(14)  |
| O(11)–Gd(2)–O(5) <sup>#1</sup>                | 138.88(11) | O(11)–Gd(2)–O(9)                             | 80.27(13)  |
| O(8)–Gd(2)–O(5) <sup>#1</sup>                 | 82.38(14)  | O(8)–Gd(2)–O(9)                              | 53.37(15)  |
| O(12) <sup>#1</sup> –Gd(2)–O(2)               | 137.24(11) | O(5) <sup>#1</sup> –Gd(2)–O(9)               | 127.74(13) |
| O(11)–Gd(2)–O(2)                              | 67.03(11)  | O(2)–Gd(2)–O(9)                              | 77.63(14)  |
| O(11)–Gd(2)–N(4)                              | 67.84(12)  | O(11)–Gd(2)–O(6) <sup>#1</sup>               | 127.06(11) |
| O(5) <sup>#1</sup> –Gd(2)–N(4)                | 86.56(12)  | O(8)–Gd(2)–O(6) <sup>#1</sup>                | 78.42(14)  |
| O(2)–Gd(2)–N(4)                               | 77.54(12)  | O(5) <sup>#1</sup> –Gd(2)–O(6) <sup>#1</sup> | 71.25(11)  |

|                                               |            |                                 |            |
|-----------------------------------------------|------------|---------------------------------|------------|
| O(9)–Gd(2)–N(4)                               | 145.28(14) | O(2)–Gd(2)–O(6) <sup>#1</sup>   | 69.12(11)  |
| O(6) <sup>#1</sup> –Gd(2)–N(4)                | 75.09(12)  | O(9)–Gd(2)–O(6) <sup>#1</sup>   | 117.28(14) |
| O(12) <sup>#1</sup> –Gd(2)–O(1)               | 70.34(10)  | O(12) <sup>#1</sup> –Gd(2)–N(4) | 100.87(11) |
| O(11)–Gd(2)–O(1)                              | 68.25(10)  | O(2)–Gd(2)–O(1)                 | 106.46(10) |
| N(4)–Gd(3)–N(1)                               | 62.34(12)  | O(9)–Gd(2)–O(1)                 | 142.58(13) |
| O(5) <sup>#1</sup> –Gd(2)–O(1)                | 73.07(11)  | O(6) <sup>#1</sup> –Gd(2)–O(1)  | 98.13(11)  |
| N(4)–Gd(2)–O(1)                               | 32.06(10)  | O(3)–Gd(3)–O(11)                | 131.84(13) |
| O(3)–Gd(3)–O(4)                               | 73.53(12)  | O(11)–Gd(3)–O(7)                | 67.86(10)  |
| O(11)–Gd(3)–O(4)                              | 83.98(12)  | O(4)–Gd(3)–O(7)                 | 80.24(11)  |
| O(3)–Gd(3)–N(27)                              | 94.01(14)  | N(27)–Gd(3)–O(7)                | 65.71(12)  |
| O(11)–Gd(3)–N(27)                             | 132.00(12) | O(2)–Gd(3)–O(7)                 | 131.70(10) |
| O(4)–Gd(3)–N(27)                              | 99.46(14)  | O(3)–Gd(3)–N(4)                 | 137.80(12) |
| O(3)–Gd(3)–O(2)                               | 81.30(13)  | O(11)–Gd(3)–N(4)                | 69.40(12)  |
| O(11)–Gd(3)–O(2)                              | 66.18(11)  | O(4)–Gd(3)–N(4)                 | 148.02(12) |
| O(4)–Gd(3)–O(2)                               | 108.60(12) | N(27)–Gd(3)–N(4)                | 86.42(13)  |
| N(27)–Gd(3)–O(2)                              | 148.72(13) | O(2)–Gd(3)–N(4)                 | 77.16(12)  |
| O(3)–Gd(3)–O(7)                               | 143.65(12) | O(7)–Gd(3)–N(4)                 | 73.61(11)  |
| O(3)–Gd(3)–N(1)                               | 77.45(12)  | N(27)–Gd(3)–N(1)                | 73.01(13)  |
| O(11)–Gd(3)–N(1)                              | 123.49(12) | O(2)–Gd(3)–N(1)                 | 75.79(12)  |
| O(4)–Gd(3)–N(1)                               | 149.43(12) | O(7)–Gd(3)–N(1)                 | 120.29(11) |
| N(28)–Ni(1)–O(1) <sup>#1</sup>                | 93.39(15)  | N(3) <sup>#1</sup> –Ni(1)–N(25) | 100.39(18) |
| N(3) <sup>#1</sup> –Ni(1)–O(1) <sup>#1</sup>  | 84.65(15)  | O(5)–Ni(2)–N(19)                | 85.03(17)  |
| N(28)–Ni(1)–N(25)                             | 81.82(17)  | N(19)–Ni(2)–N(21)               | 100.62(19) |
| O(5)–Ni(2)–N(24)                              | 92.06(16)  | O(12)–Ni(3)–N(13)               | 89.94(15)  |
| N(24)–Ni(2)–N(21)                             | 82.25(18)  | N(16)–Ni(3)–O(12)               | 103.67(16) |
| N(20)–Ni(3)–N(13)                             | 95.70(18)  | O(12)–Ni(3)–N(20)               | 90.62(15)  |
| N(16)–Ni(3)–N(17)                             | 89.84(18)  | N(16)–Ni(3)–N(13)               | 76.71(18)  |
| N(17)–Ni(3)–O(7)                              | 95.36(14)  | N(20)–Ni(3)–N(17)               | 76.39(17)  |
| O(12)–Ni(3)–O(7)                              | 82.21(12)  | N(13)–Ni(3)–N(17)               | 95.78(17)  |
| N(20)–Ni(3)–O(7)                              | 99.77(15)  | N(16)–Ni(3)–O(7)                | 90.13(15)  |
| O(6) <sup>#1</sup> –Ni(4)–N(23) <sup>#1</sup> | 85.54(17)  | O(6) <sup>#1</sup> –Ni(4)–N(8)  | 90.06(16)  |
| N(23) <sup>#1</sup> –Ni(4)–N(5)               | 101.22(19) | N(8)–Ni(4)–N(5)                 | 83.33(18)  |
| O(4)–Ni(5)–N(12)                              | 90.91(17)  | N(15)–Ni(5)–N(9)                | 101.1(2)   |
| O(4)–Ni(5)–N(15)                              | 84.11(18)  | N(12)–Ni(5)–N(9)                | 84.25(19)  |

<sup>a</sup> Symmetry codes: <sup>#1</sup> 1 – x, y, 1/2 – z.

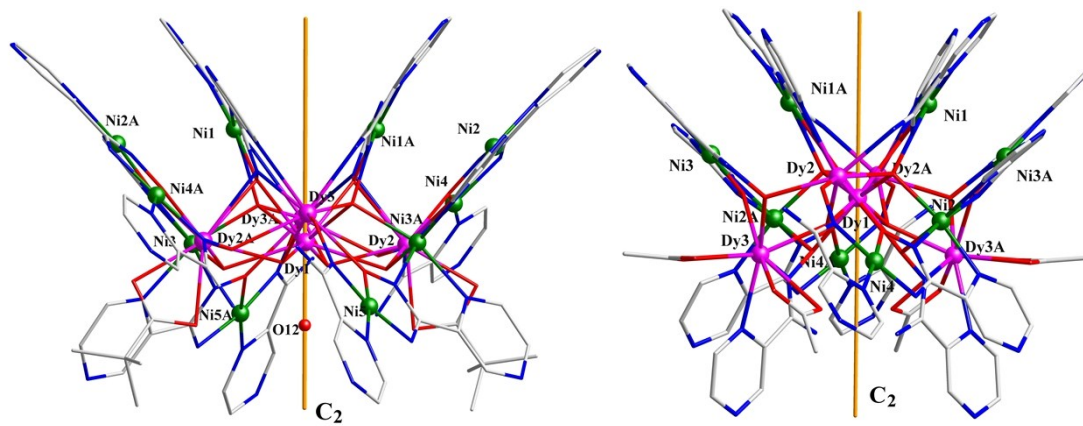

**Fig. S2.** Illustration of the  $C_2$  symmetry in **3** and **5**.



**Table S9.** Calculation of the agreement between the coordination polyhedron of **5** and various ideal polyhedra using the SHAPE program\*

| Ideal polyhedron geometry | SAPR ( $D_{4d}$ ) | TDD ( $D_{2d}$ )   | BTPR ( $C_{2v}$ )   | JBTPR ( $C_{2v}$ ) |
|---------------------------|-------------------|--------------------|---------------------|--------------------|
| Agreement factor for Dy1  | 0.980             | 1.400              | 1.711               | 2.215              |
| Agreement factor for Dy3  | 2.071             | 2.492              | 1.629               | 1.856              |
| Ideal polyhedron geometry | MFF ( $C_s$ )     | CSAPR ( $C_{4v}$ ) | JCSAPR ( $C_{4v}$ ) | TCTPR ( $D_{3h}$ ) |
| Agreement factor for Dy2  | 1.657             | 3.367              | 3.767               | 4.264              |

\*SAPR = Square antiprism, TDD = Triangular dodecahedron, BTPR = Biaugmented trigonal prism, JBTPR = Biaugmented trigonal prism; MFF= Muffin, CSAPR = Spherical capped square antiprism, JCSAPR = Capped square antiprism, TCTPR = Spherical tricapped trigonal prism.

**Table S10.** Calculation of the agreement between the coordination polyhedron of complex **6** and various ideal polyhedra using the SHAPE program \*

| Ideal polyhedron geometry | SAPR ( $D_{4d}$ ) | TDD ( $D_{2d}$ )   | BTPR ( $C_{2v}$ )   | JBTPR ( $C_{2v}$ ) |
|---------------------------|-------------------|--------------------|---------------------|--------------------|
| Agreement factor for Gd1  | 0.974             | 1.434              | 1.744               | 2.322              |
| Agreement factor for Gd3  | 2.097             | 2.462              | 1.609               | 1.926              |
| Ideal polyhedron geometry | MFF ( $C_s$ )     | CSAPR ( $C_{4v}$ ) | JCSAPR ( $C_{4v}$ ) | TCTPR ( $D_{3h}$ ) |
| Agreement factor for Gd2  | 1.719             | 3.241              | 3.727               | 4.252              |

\*SAPR = Square antiprism, TDD = Triangular dodecahedron, BTPR = Biaugmented trigonal prism, JBTPR = Biaugmented trigonal prism; MFF= Muffin, CSAPR = Spherical capped square antiprism, JCSAPR = Capped square antiprism, TCTPR = Spherical tricapped trigonal prism.

**Table S11.** Selected Bond Lengths (Å) and Angles (deg) for **5<sup>a</sup>**

|                                  |            |                                  |            |
|----------------------------------|------------|----------------------------------|------------|
| Dy(1)–O(10)                      | 2.352(3)   | Dy(1)–O(2)                       | 2.353(3)   |
| Dy(1)–O(1)                       | 2.406(3)   | Dy(1)–O(12)                      | 2.408(3)   |
| Dy(2)–O(3)                       | 2.331(3)   | Dy(2)–O(14)                      | 2.399(4)   |
| Dy(2)–O(12)                      | 2.334(3)   | Dy(2)–N(23)                      | 2.421(4)   |
| Dy(2)–O(11) <sup>#1</sup>        | 2.379(3)   | Dy(2)–N(21)                      | 2.538(4)   |
| Dy(2)–O(15)                      | 2.392(4)   | Dy(2)–O(16)                      | 2.590(4)   |
| Dy(2)–O(13)                      | 2.658(4)   | Dy(3)–O(4)                       | 2.315(3)   |
| Dy(3)–O(3)                       | 2.409(3)   | Dy(3)–O(12)                      | 2.330(3)   |
| Dy(3)–N(7)                       | 2.417(4)   | Dy(3)–O(5)                       | 2.348(3)   |
| Dy(3)–O(1)                       | 2.480(3)   | Dy(3)–N(4)                       | 2.378(4)   |
| Dy(3)–N(5)                       | 2.612(4)   | Ni(1)–O(2) <sup>#1</sup>         | 1.832(3)   |
| Ni(1)–N(3)                       | 1.848(3)   | Ni(1)–N(8) <sup>#1</sup>         | 1.836(4)   |
| Ni(1)–N(1)                       | 1.882(4)   | Ni(2)–O(11) <sup>#1</sup>        | 1.841(3)   |
| Ni(2)–N(11)                      | 1.861(4)   | Ni(2)–N(28) <sup>#1</sup>        | 1.842(4)   |
| Ni(2)–N(9)                       | 1.888(5)   | Ni(3)–N(19)                      | 2.023(4)   |
| Ni(3)–N(17)                      | 2.109(4)   | Ni(3)–O(10) <sup>#1</sup>        | 2.053(3)   |
| Ni(3)–O(1)                       | 2.150(3)   | Ni(3)–N(27)                      | 2.066(4)   |
| Ni(3)–N(25)                      | 2.096(4)   | Ni(4)–O(5)                       | 1.825(3)   |
| Ni(4)–N(15)                      | 1.856(4)   | Ni(4)–N(20)                      | 1.840(4)   |
| Ni(4)–N(13)                      | 1.877(4)   | O(10)–Dy(1)–O(10) <sup>#1</sup>  | 86.15(14)  |
| O(10)–Dy(1)–O(2) <sup>#1</sup>   | 145.20(9)  | O(10)–Dy(1)–O(1) <sup>#1</sup>   | 72.45(9)   |
| O(10)–Dy(1)–O(2)                 | 108.40(10) | O(2)–Dy(1)–O(1)                  | 77.21(10)  |
| O(2)–Dy(1)–O(1) <sup>#1</sup>    | 72.98(9)   | O(1) <sup>#1</sup> –Dy(1)–O(1)   | 141.42(13) |
| O(10)–Dy(1)–O(1)                 | 141.63(9)  | O(10)–Dy(1)–O(12)                | 77.14(9)   |
| O(2) <sup>#1</sup> –Dy(1)–O(12)  | 136.90(9)  | O(1)–Dy(1)–O(12)                 | 66.36(9)   |
| O(2)–Dy(1)–O(12)                 | 79.85(9)   | O(10)–Dy(1)–O(12) <sup>#1</sup>  | 72.70(10)  |
| O(2)–Dy(1)–O(12) <sup>#1</sup>   | 136.89(9)  | O(1)–Dy(1)–O(12) <sup>#1</sup>   | 129.50(9)  |
| O(12)–Dy(1)–O(12) <sup>#1</sup>  | 138.30(14) | O(2) <sup>#1</sup> –Dy(1)–O(2)   | 77.81(14)  |
| O(3)–Dy(2)–O(12)                 | 70.16(10)  | O(12)–Dy(2)–N(23)                | 74.99(11)  |
| O(3)–Dy(2)–O(11) <sup>#1</sup>   | 74.24(10)  | O(11) <sup>#1</sup> –Dy(2)–N(23) | 82.30(11)  |
| O(12)–Dy(2)–O(11) <sup>#1</sup>  | 81.84(10)  | O(15)–Dy(2)–N(23)                | 137.64(14) |
| O(3)–Dy(2)–O(15)                 | 77.81(13)  | O(14)–Dy(2)–N(23)                | 121.71(13) |
| O(12)–Dy(2)–O(15)                | 147.11(13) | O(14)–Dy(2)–N(21)                | 79.02(14)  |
| O(11) <sup>#1</sup> –Dy(2)–O(15) | 96.72(12)  | O(12)–Dy(2)–N(21)                | 124.76(11) |
| O(3)–Dy(2)–O(14)                 | 79.98(13)  | O(11) <sup>#1</sup> –Dy(2)–N(21) | 124.52(12) |
| O(12)–Dy(2)–O(14)                | 93.87(13)  | O(15)–Dy(2)–N(21)                | 83.11(13)  |
| O(15)–Dy(2)–O(14)                | 73.02(15)  | N(23)–Dy(2)–N(21)                | 64.06(12)  |
| O(3)–Dy(2)–N(23)                 | 140.12(11) | O(3)–Dy(2)–O(16)                 | 109.54(12) |
| O(12)–Dy(2)–O(16)                | 149.58(11) | O(3)–Dy(2)–O(13)                 | 108.93(11) |
| O(11) <sup>#1</sup> –Dy(2)–O(16) | 69.40(12)  | O(12)–Dy(2)–O(13)                | 67.45(11)  |
| O(15)–Dy(2)–O(16)                | 50.50(15)  | O(11) <sup>#1</sup> –Dy(2)–O(13) | 144.75(10) |
| O(14)–Dy(2)–O(16)                | 116.31(14) | O(15)–Dy(2)–O(13)                | 118.44(13) |

|                                                |            |                                  |            |
|------------------------------------------------|------------|----------------------------------|------------|
| N(23)–Dy(2)–O(16)                              | 91.07(13)  | O(14)–Dy(2)–O(13)                | 50.16(12)  |
| N(21)–Dy(2)–O(16)                              | 68.61(13)  | N(23)–Dy(2)–O(13)                | 73.60(11)  |
| O(16)–Dy(2)–O(13)                              | 134.93(12) | N(21)–Dy(2)–O(13)                | 66.55(12)  |
| O(4)–Dy(3)–O(12)                               | 125.40(12) | O(4)–Dy(3)–N(7)                  | 135.95(12) |
| O(4)–Dy(3)–O(5)                                | 72.68(11)  | O(12)–Dy(3)–N(7)                 | 80.17(11)  |
| O(4)–Dy(3)–N(4)                                | 93.71(13)  | N(4)–Dy(3)–N(7)                  | 89.67(13)  |
| O(12)–Dy(3)–N(4)                               | 132.36(11) | O(3)–Dy(3)–N(7)                  | 79.21(11)  |
| O(5)–Dy(3)–N(4)                                | 87.45(12)  | O(4)–Dy(3)–O(1)                  | 147.36(11) |
| O(4)–Dy(3)–O(3)                                | 79.04(12)  | O(12)–Dy(3)–O(1)                 | 66.35(9)   |
| O(12)–Dy(3)–O(3)                               | 68.88(10)  | O(5)–Dy(3)–O(1)                  | 80.62(9)   |
| O(5)–Dy(3)–O(3)                                | 113.26(11) | N(4)–Dy(3)–O(1)                  | 66.22(11)  |
| N(4)–Dy(3)–N(5)                                | 73.87(12)  | N(7)–Dy(3)–O(1)                  | 72.19(10)  |
| O(3)–Dy(3)–N(5)                                | 80.36(11)  | O(4)–Dy(3)–N(5)                  | 75.88(12)  |
| N(7)–Dy(3)–N(5)                                | 62.99(11)  | O(12)–Dy(3)–N(5)                 | 135.77(11) |
| O(1)–Dy(3)–N(5)                                | 118.83(11) | O(5)–Dy(3)–N(5)                  | 142.07(11) |
| O(2) <sup>#1</sup> –Ni(1)–N(8) <sup>#1</sup>   | 84.98(14)  | N(3)–Ni(1)–N(1)                  | 82.33(16)  |
| O(2) <sup>#1</sup> –Ni(1)–N(3)                 | 92.09(13)  | N(8) <sup>#1</sup> –Ni(1)–N(1)   | 100.54(16) |
| O(11) <sup>#1</sup> –Ni(2)–N(28) <sup>#1</sup> | 84.67(15)  | N(25)–Ni(3)–N(17)                | 91.16(14)  |
| O(11) <sup>#1</sup> –Ni(2)–N(11)               | 92.51(15)  | N(28) <sup>#1</sup> –Ni(2)–N(9)  | 100.86(19) |
| N(19)–Ni(3)–N(17)                              | 77.25(14)  | N(11)–Ni(2)–N(9)                 | 82.01(19)  |
| N(19)–Ni(3)–O(10) <sup>#1</sup>                | 93.19(13)  | N(27)–Ni(3)–N(25)                | 78.03(15)  |
| O(10) <sup>#1</sup> –Ni(3)–N(27)               | 94.43(13)  | O(10) <sup>#1</sup> –Ni(3)–N(17) | 93.43(13)  |
| N(19)–Ni(3)–N(25)                              | 94.72(15)  | N(27)–Ni(3)–N(17)                | 96.18(15)  |
| N(27)–Ni(3)–O(1)                               | 96.54(13)  | N(19)–Ni(3)–O(1)                 | 90.33(13)  |
| N(25)–Ni(3)–O(1)                               | 93.05(13)  | O(10) <sup>#1</sup> –Ni(3)–O(1)  | 83.97(11)  |
| N(20)–Ni(4)–N(13)                              | 99.95(19)  | O(5)–Ni(4)–N(20)                 | 85.22(15)  |
| N(15)–Ni(4)–N(13)                              | 84.03(19)  | O(5)–Ni(4)–N(15)                 | 90.79(15)  |

<sup>a</sup> Symmetry codes: <sup>#1</sup> 2 – x, y, 1/2 – z.

**Table S12.** Selected Bond Lengths (Å) and Angles (deg) for **6<sup>a</sup>**

|                                 |            |                                              |            |
|---------------------------------|------------|----------------------------------------------|------------|
| Gd(1)–O(1)                      | 2.377(5)   | Gd(1)–O(8)                                   | 2.408(5)   |
| Gd(1)–O(7)                      | 2.393(5)   | Gd(1)–O(2)                                   | 2.424(5)   |
| Gd(2)–O(6)                      | 2.346(6)   | Gd(2)–O(9)                                   | 2.441(6)   |
| Gd(2)–O(8)                      | 2.365(5)   | Gd(2)–O(11)                                  | 2.442(7)   |
| Gd(2)–O(3) <sup>#1</sup>        | 2.405(5)   | Gd(2)–N(27)                                  | 2.443(7)   |
| Gd(2)–N(25)                     | 2.553(7)   | Gd(2)–O(10)                                  | 2.560(6)   |
| Gd(2)–O(12)                     | 2.636(6)   | Gd(3)–O(6)                                   | 2.427(6)   |
| Gd(3)–O(5)                      | 2.334(7)   | Gd(3)–N(3)                                   | 2.446(7)   |
| Gd(3)–O(8)                      | 2.343(5)   | Gd(3)–O(2) <sup>#1</sup>                     | 2.489(5)   |
| Gd(3)–O(4)                      | 2.374(5)   | Gd(3)–N(1)                                   | 2.625(7)   |
| Gd(3)–N(8) <sup>#1</sup>        | 2.419(7)   | Ni(1)–O(1)                                   | 1.816(5)   |
| Ni(1)–N(7)                      | 1.855(7)   | Ni(1)–N(4)                                   | 1.844(7)   |
| Ni(1)–N(5)                      | 1.876(7)   | Ni(2)–N(16) <sup>#1</sup>                    | 1.832(7)   |
| Ni(2)–N(23)                     | 1.848(8)   | Ni(2)–O(3) <sup>#1</sup>                     | 1.835(5)   |
| Ni(2)–N(21)                     | 1.876(8)   | Ni(3)–N(11)                                  | 2.015(7)   |
| Ni(3)–N(13)                     | 2.088(7)   | Ni(3)–O(7) <sup>#1</sup>                     | 2.047(5)   |
| Ni(3)–O(2) <sup>#1</sup>        | 2.147(5)   | Ni(3)–N(15)                                  | 2.050(7)   |
| Ni(3)–N(9)                      | 2.087(6)   | Ni(4)–O(4)                                   | 1.813(6)   |
| Ni(4)–N(19)                     | 1.864(8)   | Ni(4)–N(12)                                  | 1.843(8)   |
| Ni(4)–N(17)                     | 1.879(9)   | O(1)–Gd(1)–O(7)                              | 108.80(17) |
| O(1)–Gd(1)–O(7) <sup>#1</sup>   | 145.07(18) | O(7) <sup>#1</sup> –Gd(1)–O(7)               | 86.1(2)    |
| O(7)–Gd(1)–O(8) <sup>#1</sup>   | 72.00(17)  | O(1) <sup>#1</sup> –Gd(1)–O(8) <sup>#1</sup> | 80.40(17)  |
| O(1)–Gd(1)–O(8)                 | 80.39(17)  | O(1)–Gd(1)–O(8) <sup>#1</sup>                | 136.58(17) |
| O(7)–Gd(1)–O(8)                 | 77.61(18)  | O(1)–Gd(1)–O(2)                              | 72.48(17)  |
| O(8) <sup>#1</sup> –Gd(1)–O(8)  | 138.0(2)   | O(7)–Gd(1)–O(2)                              | 72.31(17)  |
| O(8)–Gd(1)–O(2)                 | 129.54(17) | O(8)–Gd(1)–O(2) <sup>#1</sup>                | 66.53(17)  |
| O(1)–Gd(1)–O(2) <sup>#1</sup>   | 77.35(17)  | O(2)–Gd(1)–O(2) <sup>#1</sup>                | 141.1(2)   |
| O(7)–Gd(1)–O(2) <sup>#1</sup>   | 142.23(17) | O(1) <sup>#1</sup> –Gd(1)–O(1)               | 77.3(2)    |
| O(6)–Gd(2)–O(8)                 | 70.03(18)  | O(6)–Gd(2)–O(3) <sup>#1</sup>                | 73.63(19)  |
| O(8)–Gd(2)–O(3) <sup>#1</sup>   | 80.69(17)  | O(6)–Gd(2)–N(27)                             | 139.7(2)   |
| O(6)–Gd(2)–O(9)                 | 77.2(2)    | O(8)–Gd(2)–N(27)                             | 74.99(19)  |
| O(8)–Gd(2)–O(9)                 | 146.0(2)   | O(3) <sup>#1</sup> –Gd(2)–N(27)              | 81.58(19)  |
| O(3) <sup>#1</sup> –Gd(2)–O(9)  | 99.0(2)    | O(9)–Gd(2)–N(27)                             | 138.9(2)   |
| O(6)–Gd(2)–O(11)                | 80.5(2)    | O(11)–Gd(2)–N(27)                            | 121.5(2)   |
| O(8)–Gd(2)–O(11)                | 93.3(2)    | O(8)–Gd(2)–N(25)                             | 124.41(19) |
| O(9)–Gd(2)–O(11)                | 72.0(2)    | O(3) <sup>#1</sup> –Gd(2)–N(25)              | 124.9(2)   |
| O(6)–Gd(2)–O(10)                | 108.82(19) | O(9)–Gd(2)–N(25)                             | 83.8(2)    |
| O(8)–Gd(2)–O(10)                | 149.66(19) | O(11)–Gd(2)–N(25)                            | 79.3(3)    |
| O(3) <sup>#1</sup> –Gd(2)–O(10) | 70.38(19)  | N(27)–Gd(2)–N(25)                            | 63.8(2)    |
| O(9)–Gd(2)–O(10)                | 51.7(2)    | N(27)–Gd(2)–O(10)                            | 91.5(2)    |
| O(11)–Gd(2)–O(10)               | 116.7(2)   | N(25)–Gd(2)–O(10)                            | 69.3(2)    |
| O(3) <sup>#1</sup> –Gd(2)–O(12) | 143.05(19) | O(6)–Gd(2)–O(12)                             | 109.0(2)   |
| O(9)–Gd(2)–O(12)                | 117.7(2)   | O(8)–Gd(2)–O(12)                             | 66.87(18)  |

|                                               |            |                                              |            |
|-----------------------------------------------|------------|----------------------------------------------|------------|
| O(11)–Gd(2)–O(12)                             | 50.0(2)    | N(25)–Gd(2)–O(12)                            | 66.8(2)    |
| N(27)–Gd(2)–O(12)                             | 73.6(2)    | O(10)–Gd(2)–O(12)                            | 135.8(2)   |
| O(5)–Gd(3)–O(8)                               | 125.1(2)   | O(8)–Gd(3)–N(3)                              | 80.0(2)    |
| O(5)–Gd(3)–O(4)                               | 72.8(2)    | N(3)–Gd(3)–O(2) <sup>#1</sup>                | 72.09(19)  |
| O(8)–Gd(3)–O(4)                               | 80.68(18)  | N(8) <sup>#1</sup> –Gd(3)–N(3)               | 89.4(2)    |
| O(5)–Gd(3)–N(8) <sup>#1</sup>                 | 94.4(3)    | O(6)–Gd(3)–N(3)                              | 79.1(2)    |
| O(8)–Gd(3)–N(8) <sup>#1</sup>                 | 132.0(2)   | O(5)–Gd(3)–O(2) <sup>#1</sup>                | 147.2(2)   |
| O(4)–Gd(3)–N(8) <sup>#1</sup>                 | 87.4(2)    | O(8)–Gd(3)–O(2) <sup>#1</sup>                | 66.45(17)  |
| O(5)–Gd(3)–O(6)                               | 79.0(2)    | O(4)–Gd(3)–O(2) <sup>#1</sup>                | 80.18(17)  |
| O(8)–Gd(3)–O(6)                               | 69.02(18)  | N(8) <sup>#1</sup> –Gd(3)–O(2) <sup>#1</sup> | 65.7(2)    |
| O(4)–Gd(3)–O(6)                               | 113.69(18) | O(6)–Gd(3)–O(2) <sup>#1</sup>                | 130.05(18) |
| O(5)–Gd(3)–N(3)                               | 136.4(2)   | O(5)–Gd(3)–N(1)                              | 76.6(2)    |
| O(8)–Gd(3)–N(1)                               | 135.4(2)   | O(6)–Gd(3)–N(1)                              | 80.03(19)  |
| O(4)–Gd(3)–N(1)                               | 142.8(2)   | N(3)–Gd(3)–N(1)                              | 62.7(2)    |
| N(8) <sup>#1</sup> –Gd(3)–N(1)                | 74.2(2)    | O(2) <sup>#1</sup> –Gd(3)–N(1)               | 118.56(19) |
| O(1)–Ni(1)–N(4)                               | 85.1(3)    | N(7)–Ni(1)–N(5)                              | 81.7(3)    |
| O(1)–Ni(1)–N(7)                               | 92.2(2)    | N(4)–Ni(1)–N(5)                              | 100.9(3)   |
| N(16) <sup>#1</sup> –Ni(2)–O(3) <sup>#1</sup> | 84.6(3)    | N(16) <sup>#1</sup> –Ni(2)–N(21)             | 100.5(3)   |
| O(3) <sup>#1</sup> –Ni(2)–N(23)               | 93.1(3)    | N(23)–Ni(2)–N(21)                            | 81.8(3)    |
| N(11)–Ni(3)–O(7) <sup>#1</sup>                | 93.2(3)    | N(15)–Ni(3)–N(9)                             | 96.0(3)    |
| O(7) <sup>#1</sup> –Ni(3)–N(15)               | 95.1(2)    | N(11)–Ni(3)–N(13)                            | 94.4(3)    |
| N(11)–Ni(3)–N(9)                              | 77.7(3)    | N(15)–Ni(3)–N(13)                            | 77.6(3)    |
| O(7) <sup>#1</sup> –Ni(3)–N(9)                | 92.1(2)    | N(9)–Ni(3)–N(13)                             | 91.5(3)    |
| N(11)–Ni(3)–O(2) <sup>#1</sup>                | 90.6(2)    | N(15)–Ni(3)–O(2) <sup>#1</sup>               | 96.0(2)    |
| O(7) <sup>#1</sup> –Ni(3)–O(2) <sup>#1</sup>  | 85.3(2)    | N(13)–Ni(3)–O(2) <sup>#1</sup>               | 92.6(2)    |
| O(4)–Ni(4)–N(19)                              | 91.8(3)    | O(4)–Ni(4)–N(12)                             | 84.5(3)    |
| N(19)–Ni(4)–N(17)                             | 83.6(4)    | N(12)–Ni(4)–N(17)                            | 100.2(4)   |

<sup>a</sup> Symmetry codes: #1 – x, y, 1/2 – z.

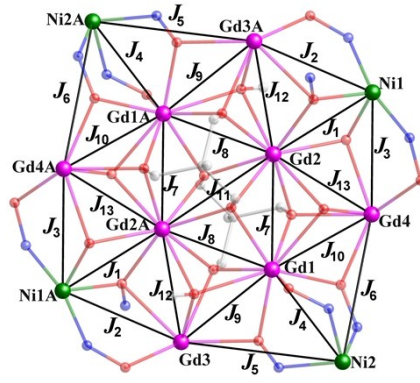

Fig. S3. Magnetic exchange pathways in  $\{Gd_8Ni_4\}$ .

**Table S13.** Geometric parameters for the superexchange pathways in **2**.

|                   | coupling<br>constant | $\theta$ (deg)      | $\beta$ (deg) | $r_{\text{Gd}\cdots\text{Ni (Gd)}} (\text{\AA})$ | magnetic bridges                                                                          |
|-------------------|----------------------|---------------------|---------------|--------------------------------------------------|-------------------------------------------------------------------------------------------|
| <b>2</b>          |                      |                     |               |                                                  |                                                                                           |
| Gd2 $\cdots$ Ni1  | $J_1$                | 104.9 / 105.7       | 1.219         | 3.5701                                           | $\mu_3\text{-OH}^-$ , $\mu_3\text{-O}_{\text{oximate}}$                                   |
| Gd3 $\cdots$ Ni1  | $J_2$                | 117.6               | –             | 3.9874                                           | $\mu_3\text{-O}_{\text{oximate}}$ , $\text{-NO-}$                                         |
| Gd4 $\cdots$ Ni1  | $J_3$                | 120.7               | –             | 3.8624                                           | $\mu_3\text{-OH}$ , $\text{-NO-}$                                                         |
| Gd1 $\cdots$ Ni2  | $J_4$                | –                   | –             | 3.6424                                           | $\text{-NO-}$ , $\text{-NO-}$ , $\text{-NO-}$                                             |
| Gd3 $\cdots$ Ni2  | $J_5$                | –                   | –             | 5.2665                                           | $\text{-NO-}$                                                                             |
| Gd4 $\cdots$ Ni2  | $J_6$                | –                   | –             | 4.9970                                           | $\text{-NO-}$                                                                             |
| Gd1 $\cdots$ Gd2  | $J_7$                | 90.7 / 94.3 / 97.0  | –             | 3.5455                                           | $\mu_3\text{-OH}^-$ , $\mu_3\text{-O}_{\text{temp}}$ , $\mu_3\text{-O}_{\text{temp}}$     |
| Gd1 $\cdots$ Gd2A | $J_8$                | 90.3 / 94.1 / 96.6  | –             | 3.5713                                           | $\mu_3\text{-OCH}_3$ , $\mu_3\text{-O}_{\text{temp}}$ , $\mu_3\text{-O}_{\text{temp}}$    |
| Gd1 $\cdots$ Gd3  | $J_9$                | 95.5 / 98.7 / 102.7 | –             | 3.6749                                           | $\mu_3\text{-OCH}_3$ , $\mu_3\text{-O}_{\text{temp}}$ , $\mu_2\text{-O}_{\text{oximate}}$ |
| Gd1 $\cdots$ Gd4  | $J_{10}$             | 96.8 / 98.6 / 100.6 | –             | 3.6600                                           | $\mu_3\text{-OH}^-$ , $\mu_3\text{-O}_{\text{temp}}$ , $\mu_2\text{-O}_{\text{oximate}}$  |
| Gd2 $\cdots$ Gd2A | $J_{11}$             | 115.3 / 115.3       | 0             | 4.0941                                           | $\mu_3\text{-O}_{\text{temp}}$ , $\mu_3\text{-O}_{\text{temp}}$                           |
| Gd2 $\cdots$ Gd3  | $J_{12}$             | 92.9 / 94.2 / 97.9  | –             | 3.5974                                           | $\mu_3\text{-OCH}_3$ , $\mu_3\text{-O}_{\text{temp}}$ , $\mu_3\text{-O}_{\text{oximate}}$ |
| Gd2 $\cdots$ Gd4  | $J_{13}$             | 95.7 / 97.1 / 98.3/ | –             | 3.6144                                           | $\mu_3\text{-OH}^-$ , $\mu_3\text{-OH}^-$ , $\mu_3\text{-O}_{\text{temp}}$                |
